# Supplementary material
Source: PubMed Central journal article supplement (PMC5916814)
Supplement: NIHMS952458-supplement-1.pdf [file NIHMS952458-supplement-1.pdf]

Figure S1 Related to Figure 3.

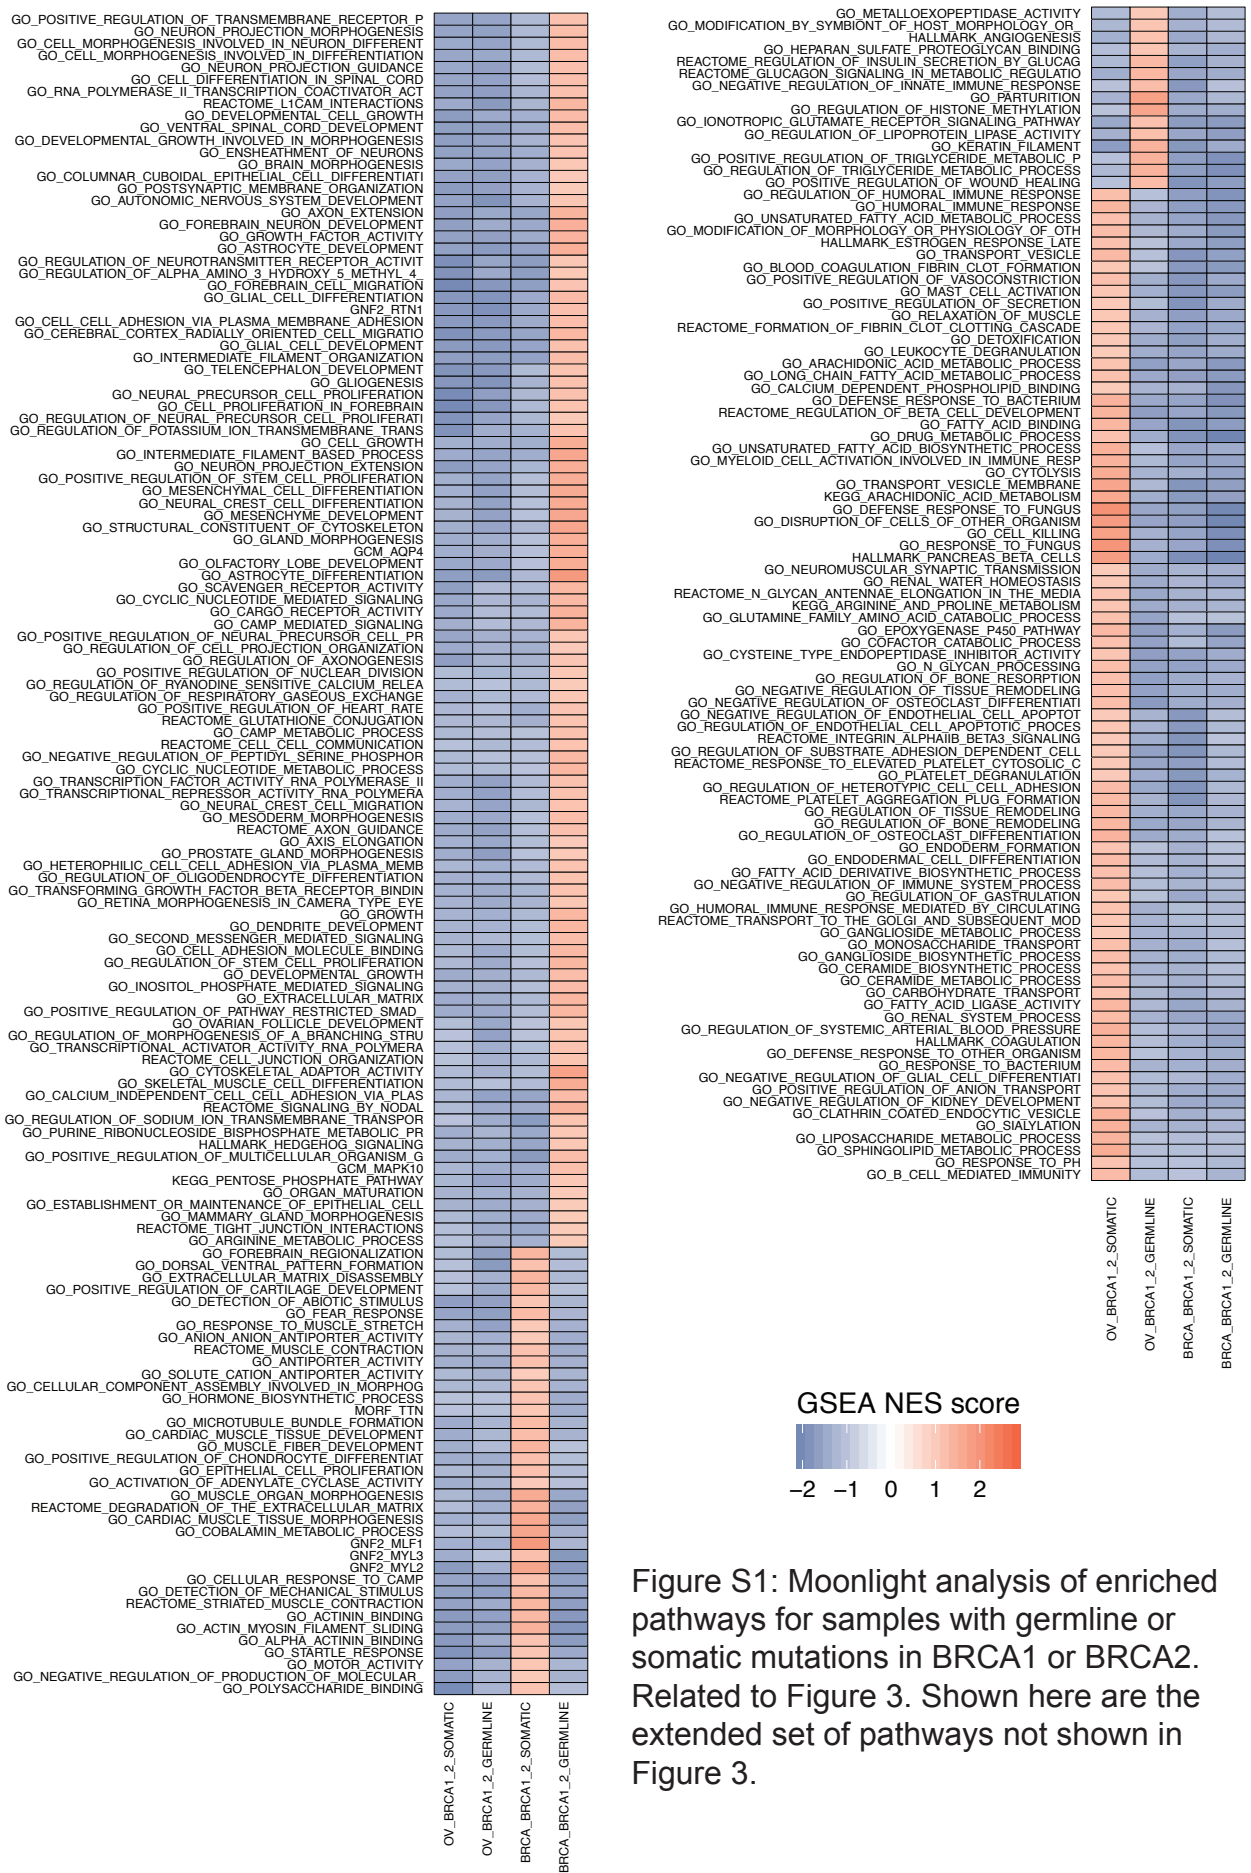

Figure S1: Moonlight analysis of enriched pathways for samples with germline or somatic mutations in BRCA1 or BRCA2. Related to Figure 3. Shown here are the extended set of pathways not shown in Figure 3.
