# Supplementary material
Source: PubMed Central journal article supplement (PMC5916814)
Supplement: NIHMS952458-supplement-2.pdf [file NIHMS952458-supplement-2.pdf]

Figure S2. Related to Figure 4

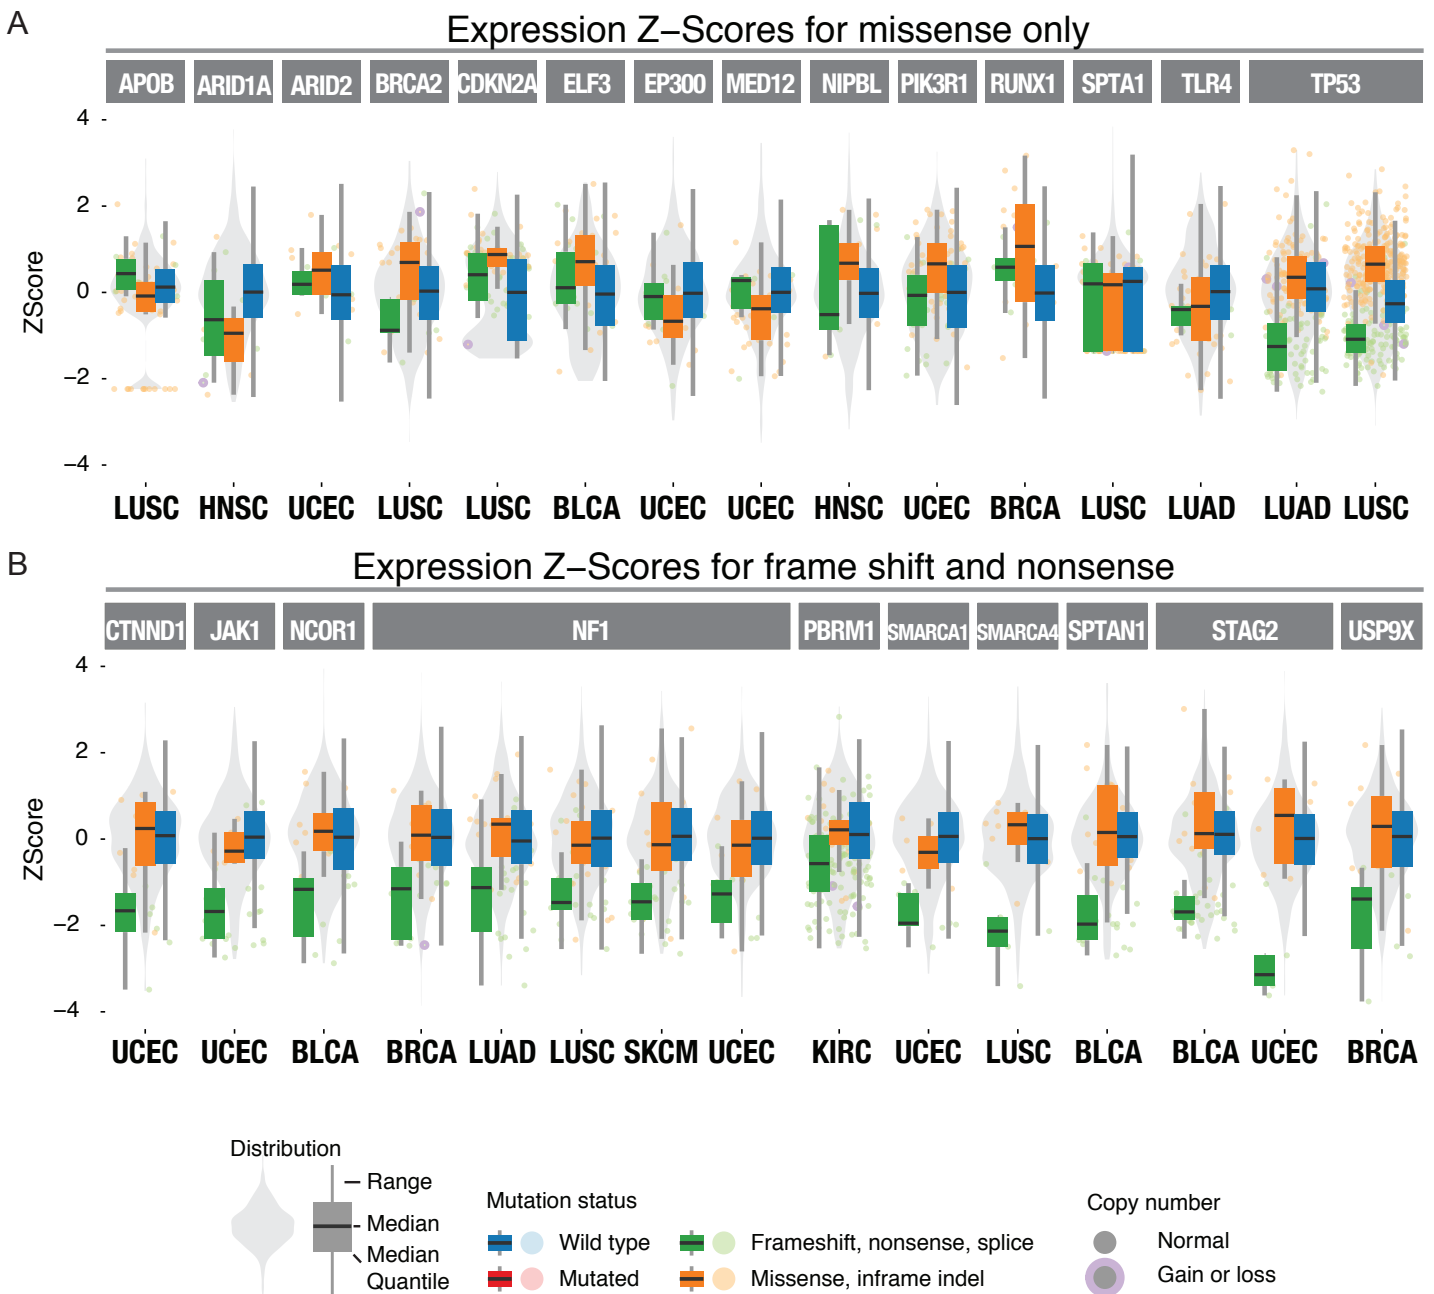

Figure S2: Alternative grouping for cis-expression differences. Related to Figure 4. For the main text Figure 4, only missense mutations and frameshift indels were considered. The top 15 t-values using an extended definition of missense mutations to include in-frame indels A. And frameshift/nonsense mutations, here, include splice site mutations B.
